# Supplementary material for: Recombinant Peptide Production Platform Coupled with Site-Specific Albumin Conjugation Enables a Convenient Production of Long-Acting Therapeutic Peptide
Source: Pharmaceutics. 2020 Apr 16;12(4):364. doi: 10.3390/pharmaceutics12040364 (PMC7238188; doi:10.3390/pharmaceutics12040364)
Supplement: Supplementary file 1 [file pharmaceutics-12-00364-s001.pdf]

# Supplementary Materials: Recombinant Peptide Production Platform Coupled with Site-Specific Albumin Conjugation Enables a Convenient Production of Long-Acting Therapeutic Peptide

Mijeong Bak, Junyong Park, Kiyoon Min, Jinhwan Cho, Jihyoun Seong, Young S. Hahn, Giyoong Tae and Inchan Kwon

**Table S1.** Oligonucleotide primers used in this study.

| Primer Name | Oligonucleotide Sequence (5'→3')         | Generated Plasmid      |
|-------------|------------------------------------------|------------------------|
| V16AzF_F    | AAGGCACCTTTACCAGCGATTAGAGTAGCTATCTGGAAGG | pQE80-sfGFP-GLP1_16Amb |
| V16AzF_R    | CCTTCCAGATAGCTACTCTAATCGCTGGTAAAGGTGCCTT |                        |
| Y19AzF_F    | GCGATGTGAGTAGCTAGCTGGAAGGTCAGGC          | pQE80-sfGFP-GLP1_19Amb |
| Y19AzF_R    | GCCTGACCTTCCAGCTAGCTACTCACATCGC          |                        |
| F28AzF_F    | GTCAGGCGGCCAAAGAATAGATTGCCTGGCTGGTGC     | pQE80-sfGFP-GLP1_28Amb |
| F28AzF_R    | GCACCAGCCAGGCAATCTATTCTTTGGCCGCCTGAC     |                        |
| A8G_F       | GCATCGAAGGTAGGCATGGTGAAGGCACCTTTACCAG    | -                      |
| A8G_R       | CTGGTAAAGGTGCCTTCACCATGCCTACCTTCGATGC    |                        |

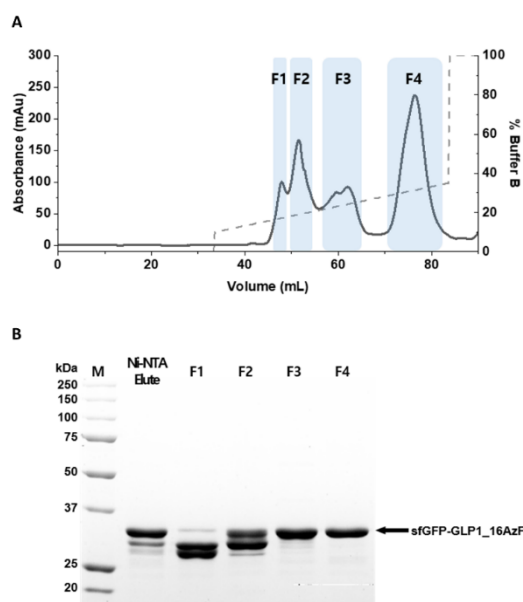

**Figure S1.** Purification of sfGFP-GLP1\_16AzF. After nickel-nitrilotriacetic acid (Ni-NTA) purification of the cell lysates (the Ni-NTA elute in the gel image), further purification by anion exchange chromatography (A) was carried out to remove impurities from the sfGFP-GLP1\_16AzF variant, as revealed by the gel image. Each fraction was investigated by sodium dodecyl sulfate–polyacrylamide gel electrophoresis (SDS-PAGE). (B) The elution sample from the Ni-NTA purification was desalted with PD-10 and loaded onto a HiTrap Q HP column equilibrated with 20 mM Tris (pH 8.0), then eluted with an NaCl gradient. The dotted line represents the percentage of Buffer B (20 mM Tris with 1 M NaCl; pH 8.0). sfGFP-GLP1\_16AzF (fractions 3 and 4; F3 and F4) was isolated from the impurities expected from the premature transition termination caused by the “amber” stop codon (fractions 1 and 2; F1 and F2), as revealed by the protein gel.

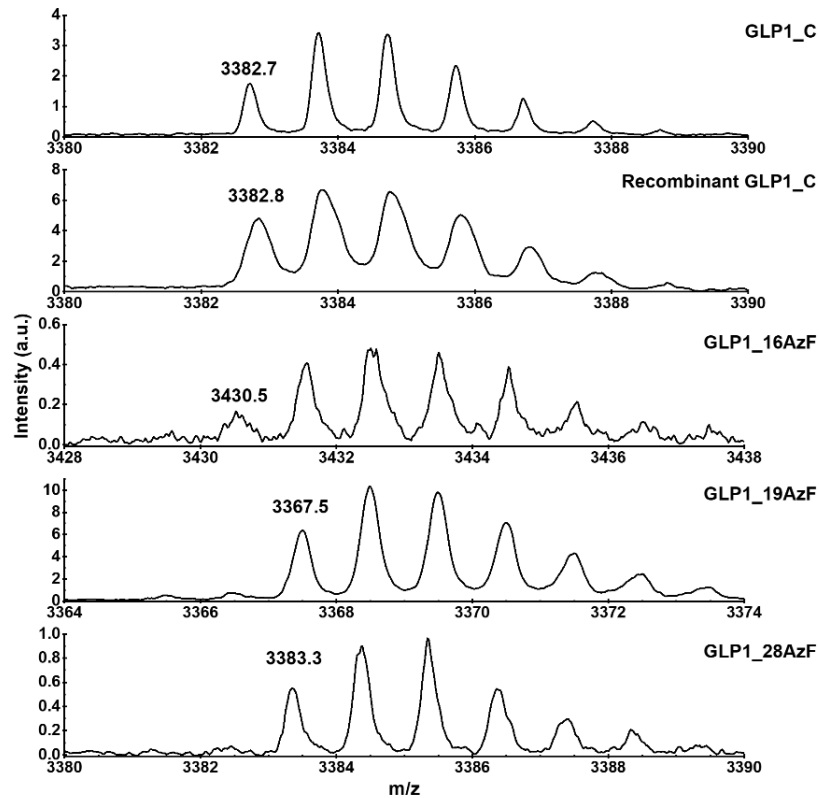

**Figure S2.** Monoisotopic mass confirmation by matrix-assisted laser desorption/ionization time-of-flight mass spectroscopy (MALDI-TOF MS) analysis of the chemically synthesized GLP1\_C, recombinant GLP1\_C, and GLP1\_AzF variants. The monoisotopic masses of the chemically synthesized GLP1\_C and recombinant GLP1\_C were 3382.7 and 3382.8  $m/z$ , respectively. The monoisotopic masses of GLP1\_16AzF, GLP1\_19AzF, and GLP1\_28AzF were 3430.5, 3367.5, and 3383.3  $m/z$ , respectively.

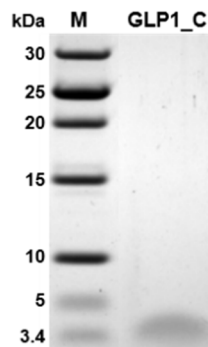

**Figure S3.** Confirmation of the molecular weight of GLP1\_C on the 15% tricine gel stained with Coomassie brilliant blue. The band for GLP1\_C located around 3.4-kDa band, which is consistent with its expected molecular weight, 3381.7 Da. M: protein molecular weight standards (Thermo Fisher Scientific, Inc., Waltham, MA, USA).

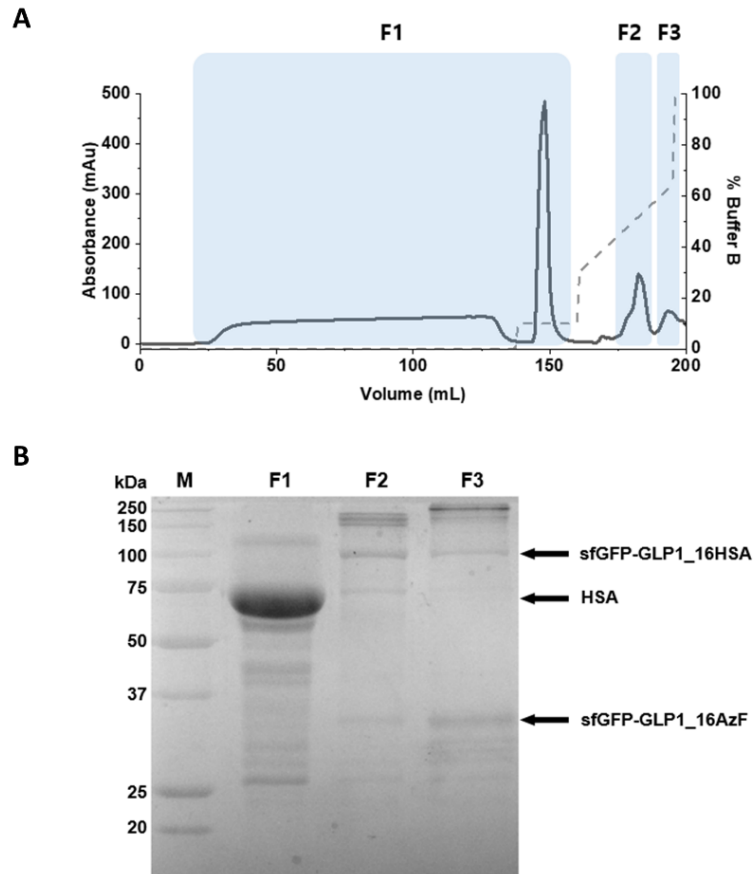

**Figure S4.** Purification of sfGFP-GLP1\_16HSA after the conjugation of sfGFP-GLP1\_16AzF and HSA-DBCO by strain-promoted azide-alkyne cycloaddition (SPAAC). After the conjugation of sfGFP-GLP1\_16AzF and HSA-DBCO by SPAAC, cation exchange chromatography was carried out to purify the sfGFP-GLP1\_16HSA. (A) The cation exchange chromatogram. The reacted conjugate was desalted with PD-10, loaded onto a HiTrap SP-HP column equilibrated with 20 mM sodium phosphate (pH 6.0), and eluted with an NaCl gradient. The fractions were collected and evaluated on protein gel (B). The dotted line represents the percentage of Buffer B (20 mM sodium phosphate with 1 M NaCl; pH 6.0). (B) Protein gel image associated with the cation exchange chromatogram. Protein molecular weight standards are shown in lane M. There was unreacted albumin-DBCO, which was not bound to the column (F1). The sfGFP-GLP1\_16HSA conjugate was eluted in F2. The unreacted sfGFP-GLP1\_16AzF was eluted in F3.

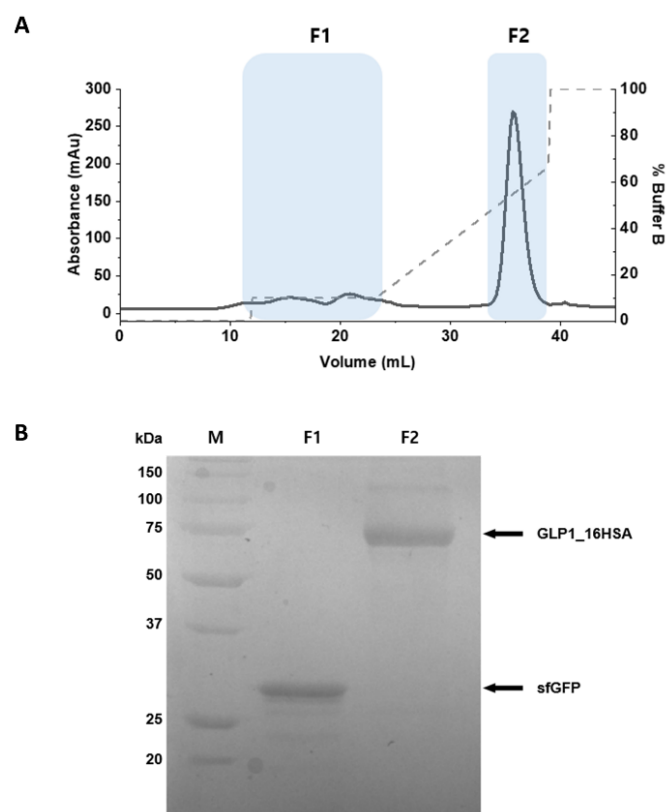

**Figure S5.** Purification of GLP1\_16HSA after proteolytic cleavage by Factor Xa. After the proteolytic cleavage of sfGFP-GLP1\_16HSA by Factor Xa, anion exchange chromatography was carried out to purify GLP1\_16HSA. (A) The anion exchange chromatogram. The cleaved mixture of sfGFP and GLP1\_16HSA was desalted with PD-10, loaded onto a HiTrap Q-HP column equilibrated with 20 mM Bis-Tris (pH 6.0), and eluted with an NaCl gradient. The fractions were collected and evaluated on protein gel (B). The dotted line represents the percentage of Buffer B (20 mM Bis-Tris with 1 M NaCl; pH 6.0). (B) Protein gel image associated with the anion exchange chromatogram. Protein molecular weight standards are shown in lane M. Cleaved sfGFP was observed in F1. GLP1\_16HSA was observed in F2, as indicated in the gel image.

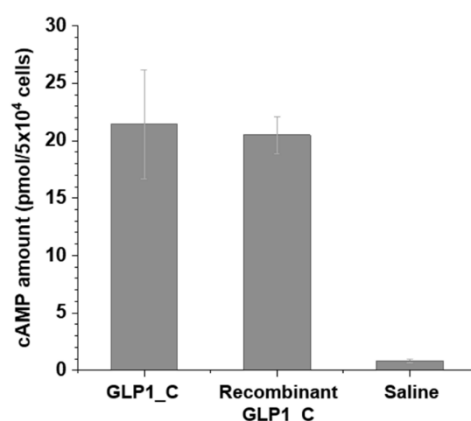

**Figure S6.** Comparative study of the biological activity of chemically synthesized GLP1\_C (GLP1\_C) and recombinant GLP1\_C in GLP-1R-expressing cells. The cAMP production levels of GLP1\_C and the recombinant GLP1\_C in the GLP-1R-expressing cells were compared. The recombinant GLP1\_C was obtained by processing sfGFP-GLP1\_C with 1/500 (*w/w*) Factor Xa protease at room temperature for 12 h. There was no further purification. The concentration of both GLP1\_C peptides was 10<sup>-7</sup> M.

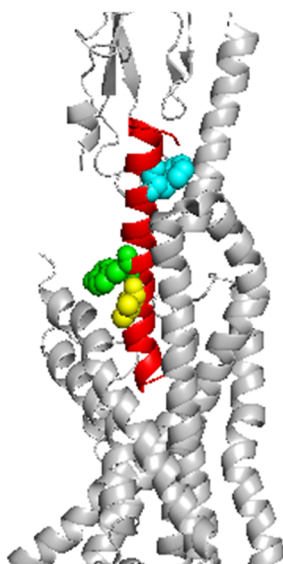

**Figure S7.** Location of V16, Y19 and F28 residues on Cryo-EM structure of the activated Glucagon-like peptide-1 receptor. The activated GLP-1R with bound GLP-1 is colored in gray, and the bound GLP-1 is colored in red. Each V16 residue, Y19 residue, and F28 residue (PDB ID: 5vai) is marked with yellow, green and cyan respectively. The difference on direction of side chain is observed on the image.
